# Supplementary material for: What Mathematical Models Are Accurate for Prescribing Aerobic Exercise in Women with Fibromyalgia?
Source: MDPI journal article supplement (doi:10.3390/biology11050704), 2022-05-04
Supplement: s1 [file s1]

**Table S1.** Shapiro-Wilk results of heart rate achieved in the cardiopulmonary exercise test and mathematical models.

| Method           | Contrast | p-value |
|------------------|----------|---------|
| HR at VT1        | 0.908    | 0.094   |
| 220 – age        | 0.943    | 0.353   |
| 209 – 0.85 × age | 0.943    | 0.353   |
| 208 – 0.7 × age  | 0.943    | 0.353   |
| Karvonen Formula | 0.944    | 0.370   |

HR: Heart rate; VT1: Ventilatory threshold 1.

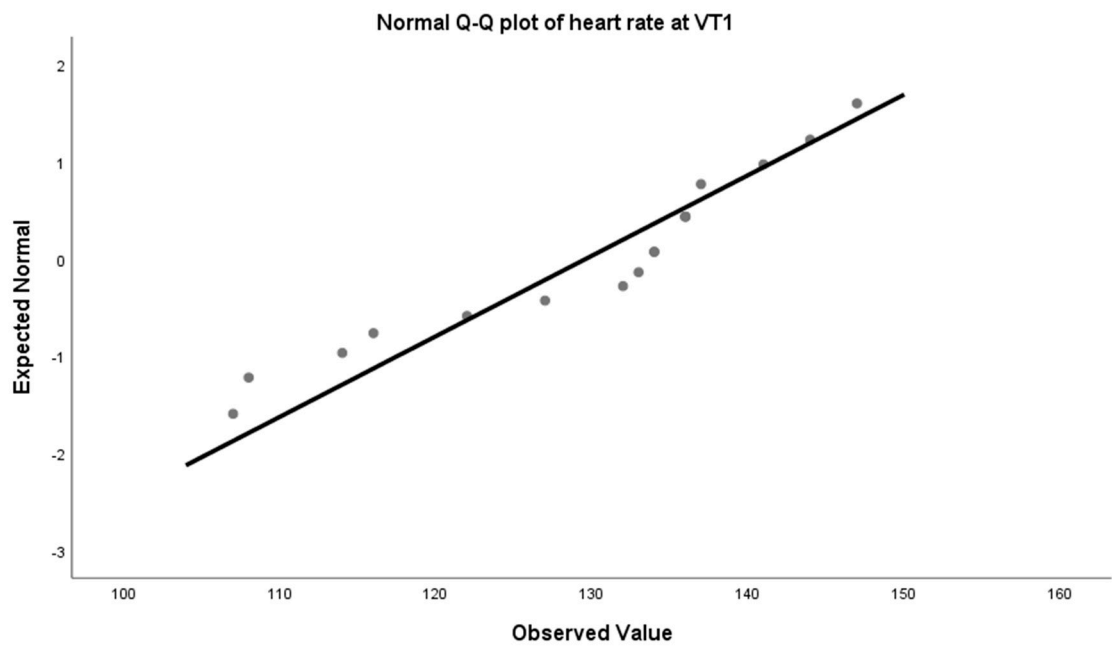

**Figure S1.** Normal Q-Q plot of heart rate at ventilatory threshold 1.

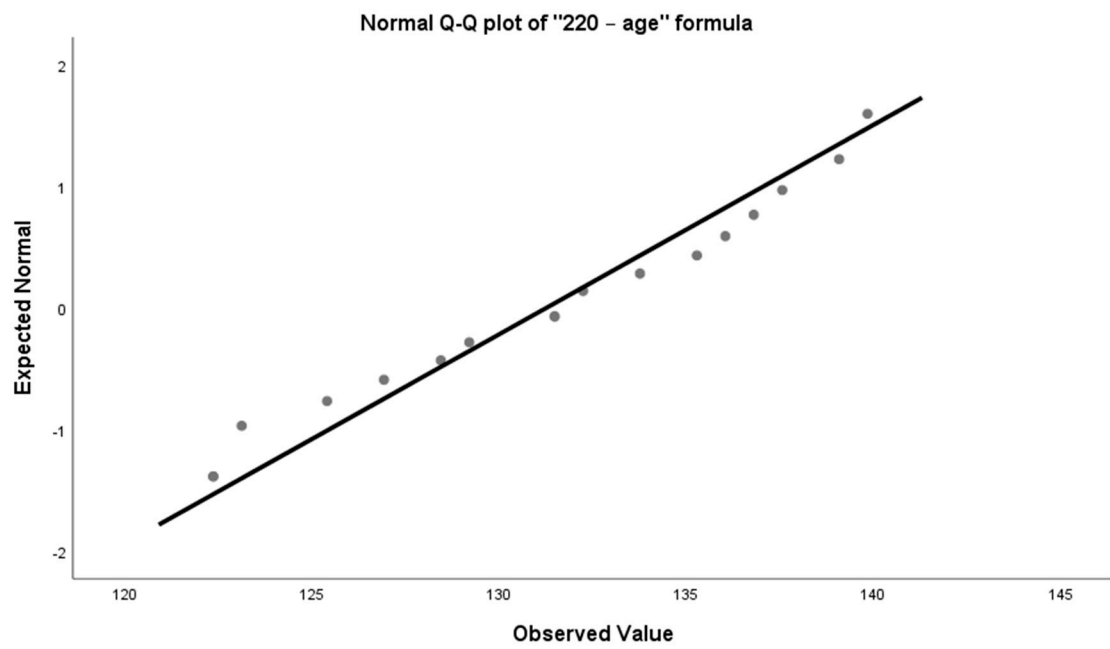

Figure S2. Normal Q-Q plot of "220 - age" formula.

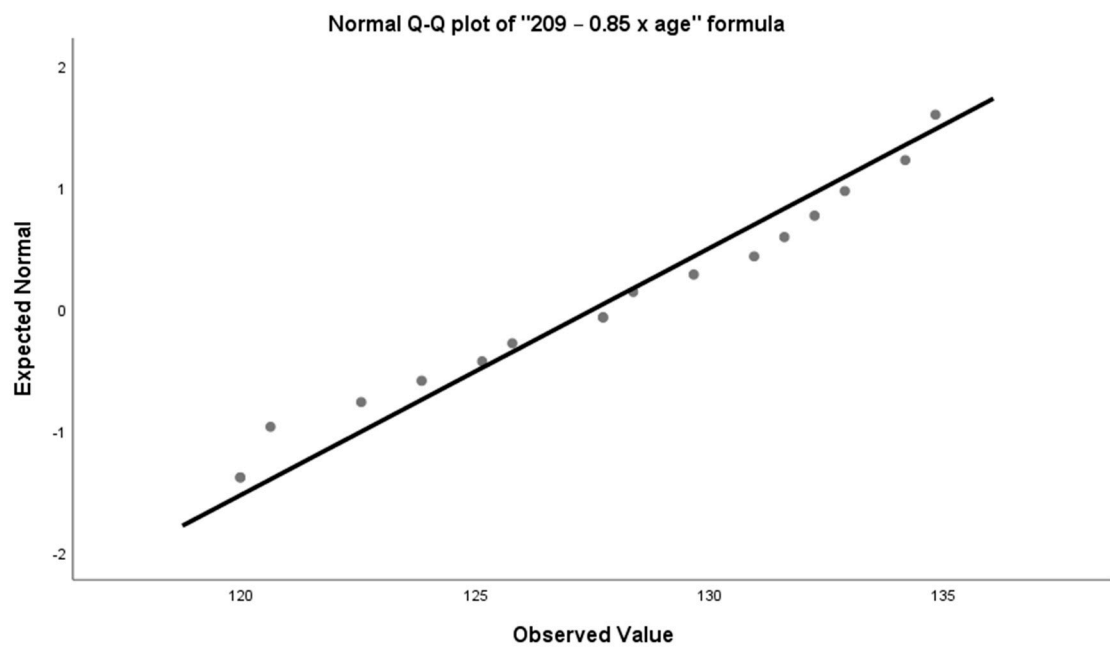

Figure S3. Normal Q-Q plot of "220 - age" formula.

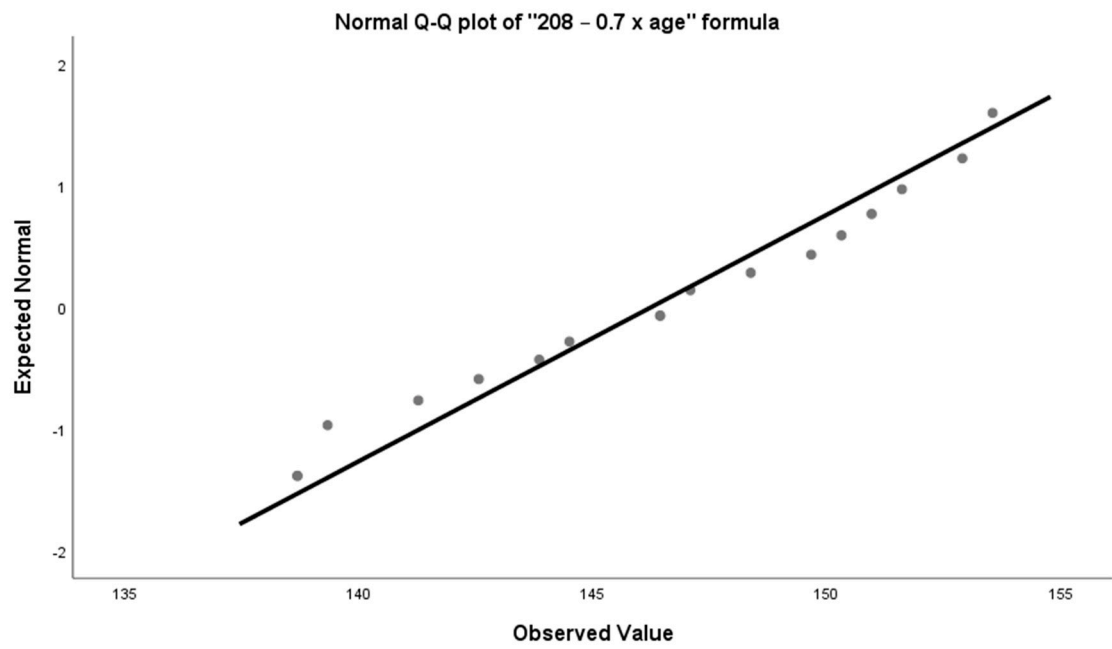

**Figure S4.** Normal Q-Q plot of "208 - 0.7 × age" formula.

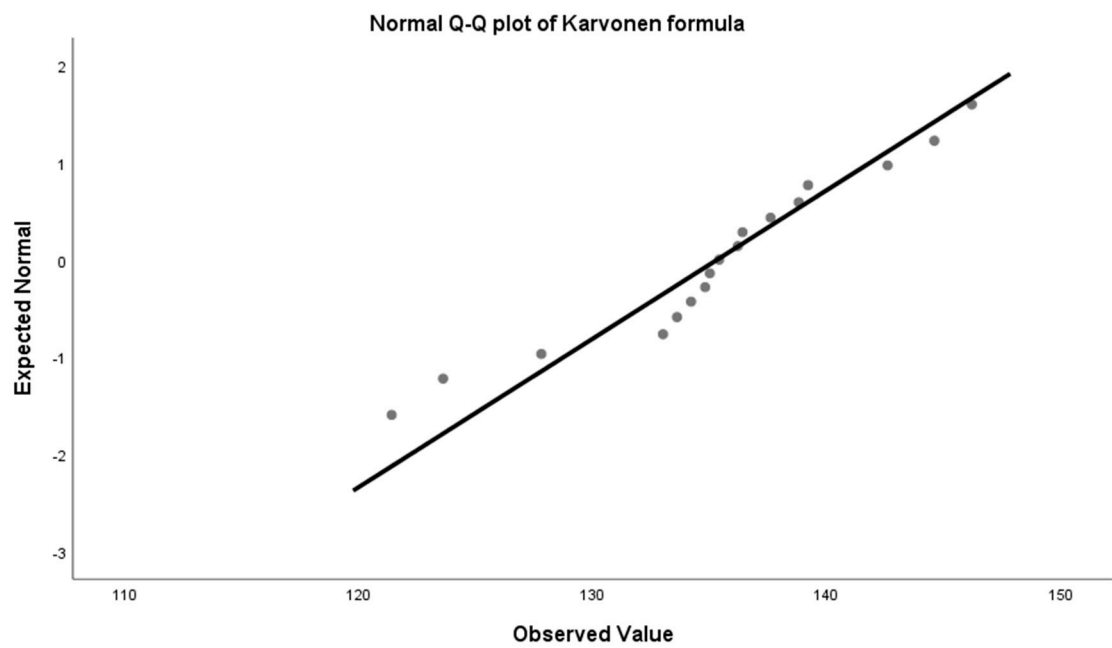

**Figure S5.** Normal Q-Q plot of Karvonen formula.
